# Supplementary material for: Self-powered, temperature-sensitive, solar-blind photodetector based on a Pt–ZnGa 2 O 4 –Al Schottky junction induced by coupling of photovoltaic and interfacial pyroelectric effects
Source: Royal Society of Chemistry journal article supplement (doi:10.1039/d4tc04337e), 2024-11-20
Supplement: d4tc04337e1.pdf [file d4tc04337e1.pdf]

## Supporting Information

### Supplementary Note 1: The contact between metal electrode and semiconductor.

The linear and sub-linear  $I$ - $V$  curves in darkness reveal that the Al-ZnGa<sub>2</sub>O<sub>4</sub>-Al and Pt-ZnGa<sub>2</sub>O<sub>4</sub>-Pt structures exhibit ohmic and Schottky contacts, respectively, at their Al/ZnGa<sub>2</sub>O<sub>4</sub> and Pt/ZnGa<sub>2</sub>O<sub>4</sub> interfaces.

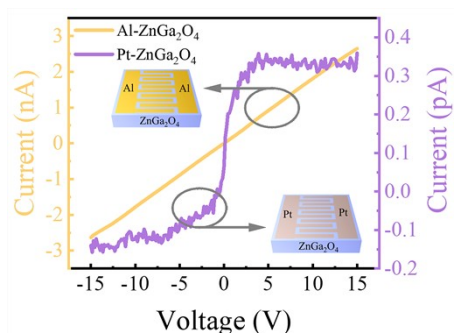

**Figure S1.**  $I$ - $V$  curves of Al-ZnGa<sub>2</sub>O<sub>4</sub>-Al and Pt-ZnGa<sub>2</sub>O<sub>4</sub>-Pt device in the dark (inset shows a schematic diagram of the device).

### Supplementary Note 2: The $I$ - $V$ characteristic curves of symmetrical electrodes in a dark state at different temperatures.

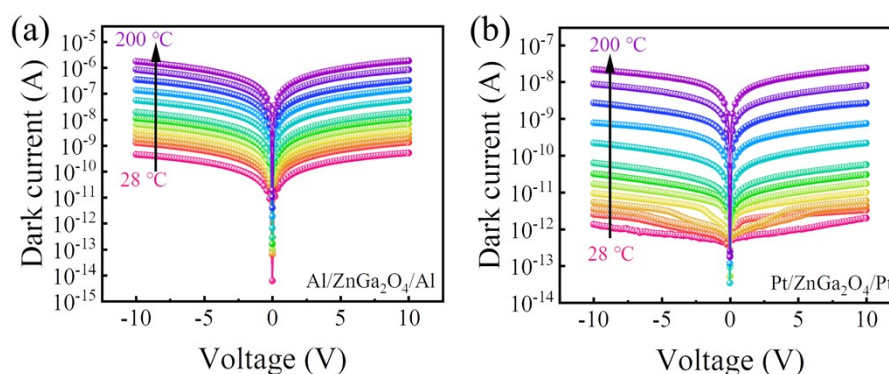

**Figure S2.**  $I$ - $V$  characteristic curves at different temperatures of Al-ZnGa<sub>2</sub>O<sub>4</sub>-Al and Pt-ZnGa<sub>2</sub>O<sub>4</sub>-Pt devices in the dark

**Supplementary Note 3: The effect of 255 nm light irradiation at different background light intensities on the spike current of the device.**

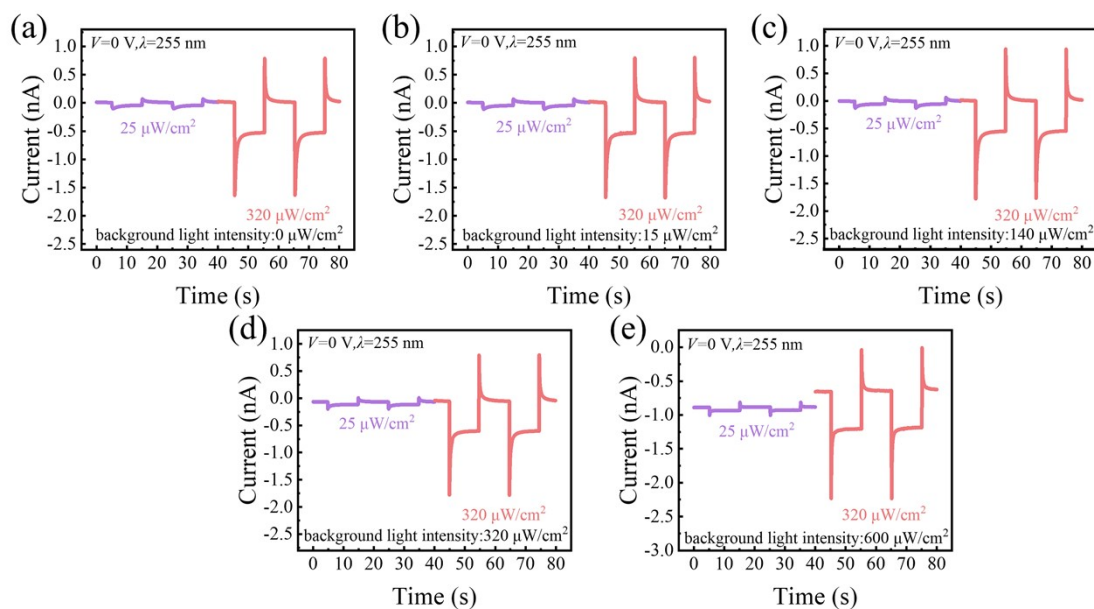

**Figure S3.**  $I$ - $t$  characteristic curves of the device under different intensities of 255 nm background illumination.
